# Supplementary material
Source: MDPI journal article supplement (https://www.mdpi.com/2300-7575/24/1/4)
Supplement: s1 [file s1]

**Table S1.** Seasonal changes in the concentrations of SO<sub>4</sub><sup>2-</sup>, Cl<sup>-</sup>, DOC and Water color in the studied lagoons.

| Sampling point                  | Sampling date | T, °C | Water color, Pt-Co | SO <sub>4</sub> <sup>2-</sup> , mg/l | DOC, mg/l | Cl <sup>-</sup> , mg/l |
|---------------------------------|---------------|-------|--------------------|--------------------------------------|-----------|------------------------|
| Mērsrags Sea                    | 30.07.2020    | n.a.  | 27                 | 363                                  | 18        | n.a.                   |
|                                 | 25.11.2020    | 5.7   | 26                 | 450                                  | 18        | 3209                   |
|                                 | 25.02.2021    | n.a.  | 14                 | 270                                  | 16        | 2955                   |
|                                 | 12.05.2021    | n.a.  | 22                 | 275                                  | 18        | 3631                   |
|                                 | 29.06.2021    | n.a.  | 40                 | 195                                  | 19        | 2955                   |
| Mērsrags S1                     | 03.07.2020    | n.a.  | 51                 | 325                                  | 23        | 2688                   |
|                                 | 30.07.2021    | 19.8  | 40                 | 375                                  | 22        | 3006                   |
|                                 | 25.11.2020    | 5.8   | 31                 | 350                                  | 17        | 3033                   |
|                                 | 25.02.2021    | 1.6   | 83                 | 115                                  | 21        | 1131                   |
|                                 | 12.05.2021    | 15.6  | 44                 | 220                                  | 19        | 2668                   |
|                                 | 29.06.2021    | 26.6  | 69                 | 255                                  | 22        | 3040                   |
| Mērsrags S2                     | 03.07.2020    | n.a.  | 69                 | 288                                  | 22        | 2601                   |
|                                 | 30.07.2021    | 20.8  | 47                 | 263                                  | 23        | 3074                   |
|                                 | 25.11.2020    | 5.4   | 30                 | 350                                  | 18        | 2922                   |
|                                 | 25.02.2021    | 2.2   | 116                | 140                                  | 22        | 1368                   |
|                                 | 12.05.2021    | 15.8  | 51                 | 215                                  | 20        | 2077                   |
|                                 | 29.06.2021    | 26.4  | 74                 | 150                                  | 24        | 2567                   |
| Mērsrags N                      | 03.07.2020    | n.a.  | 60                 | 338                                  | 23        | 2729                   |
|                                 | 30.07.2021    | 19.2  | 49                 | 388                                  | 21        | 3242                   |
|                                 | 25.11.2020    | 5.5   | 64                 | 325                                  | 20        | 2736                   |
|                                 | 25.02.2021    | 1.9   | 71                 | 60                                   | 19        | 490                    |
|                                 | 12.05.2021    | 14.7  | 42                 | 240                                  | 19        | 3276                   |
|                                 | 29.06.2021    | 26.8  | 77                 | 260                                  | 19        | 3141                   |
| Randu pļavu Sea                 | 11.08.2020    | n.a.  | 66                 | 300                                  | 23        | 2820                   |
|                                 | 24.11.2020    | 6.1   | 40                 | 338                                  | 18        | 2702                   |
|                                 | 23.02.2021    | n.a.  | 28                 | 388                                  | 20        | 6552                   |
|                                 | 11.05.2021    | n.a.  | 52                 | 195                                  | 22        | 2094                   |
|                                 | 01.07.2021    | n.a.  | 39                 | 235                                  | 18        | 2972                   |
| Randu pļavas connected with Sea | 15.07.2020    | n.a.  | 71                 | 325                                  | n.a.      | 2540                   |
|                                 | 11.08.2020    | 23.1  | 117                | 225                                  | 29        | 1993                   |
|                                 | 24.11.2020    | 5.6   | 65                 | 263                                  | 23        | 2229                   |
|                                 | 23.02.2021    | 0.6   | 164                | 138                                  | 33        | 2972                   |
|                                 | 11.05.2021    | 17.7  | 117                | 170                                  | 24        | 2060                   |
|                                 | 01.07.2021    | 30.1  | 88                 | 235                                  | 19        | 2786                   |
| Randu pļavas isolated from Sea  | 15.07.2020    | n.a.  | 136                | 288                                  | n.a.      | 2378                   |
|                                 | 11.08.2020    | 21.7  | 256                | 163                                  | 37        | 1824                   |
|                                 | 24.11.2020    | 5.5   | 95                 | 250                                  | 23        | 2060                   |
|                                 | 23.02.2021    | 1.1   | 184                | 113                                  | 33        | 2364                   |
|                                 | 11.05.2021    | 16.6  | 152                | 145                                  | 27        | 1452                   |
|                                 | 01.07.2021    | 28.2  | 174                | 200                                  | 32        | 2145                   |

n.a. – not analysed

**Figure S 1.** Feeding functional structure of Rotifera community by biomass in the studied lagoons: (a) the “Randu pļavas” lagoon, (b) southern part of the Mērsrags lagoon; (c) northern part of the Mērsrags lagoon.

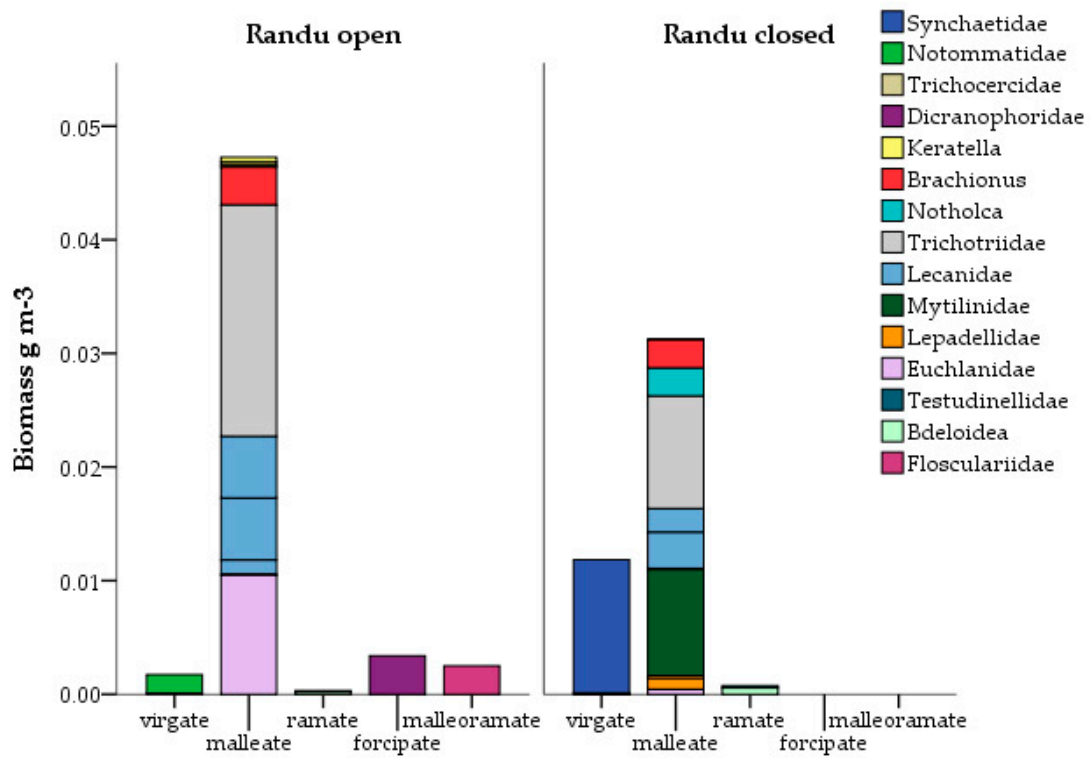

(a) the “Randu pļavas” lagoon

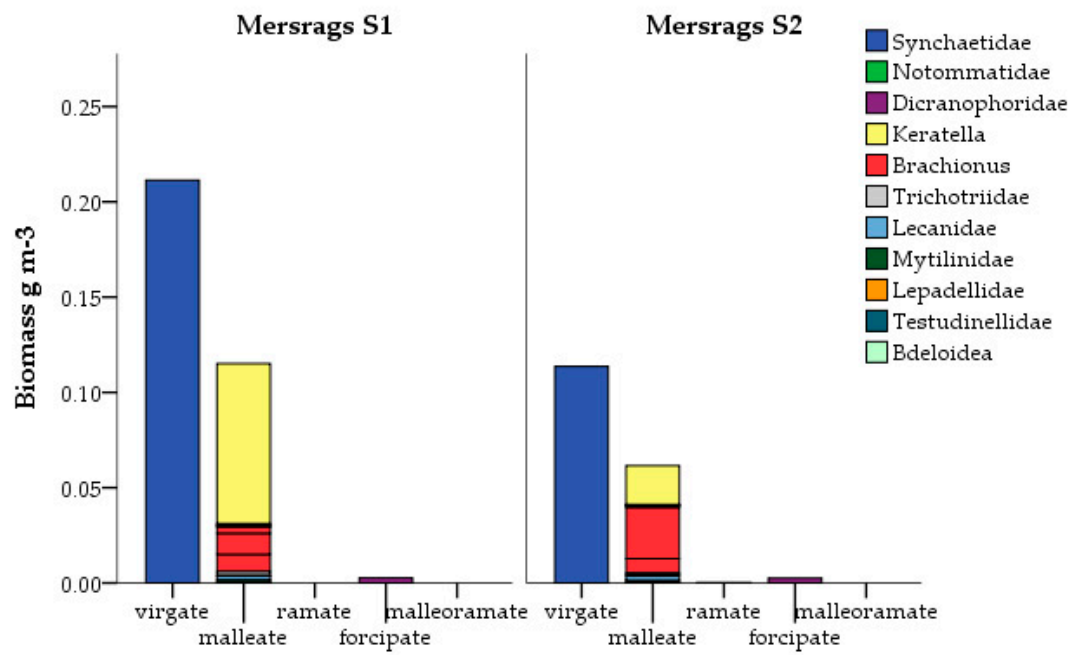

(b) southern part of the Mersrags lagoon

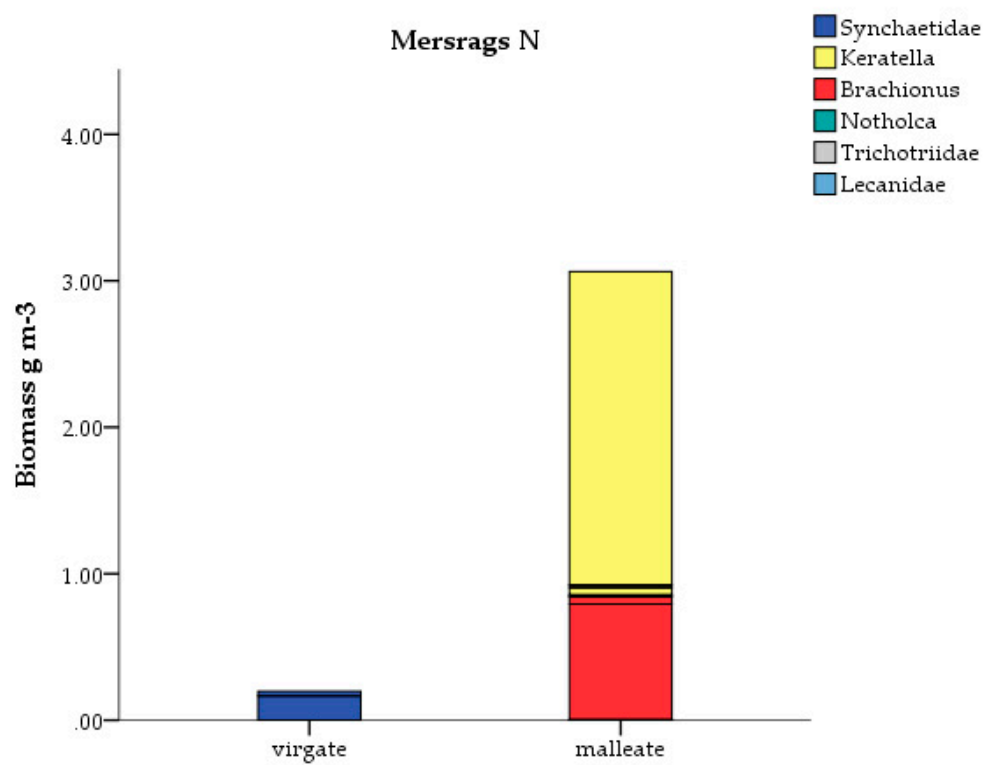

(c) northern part of the Mersrags lagoon
